# Supplementary material for: Heterogeneity and functional diversity of human T cells in periapical lesions
Source: Research Square preprint supplement (doi:10.21203/rs.3.rs-1469457/v1), 2022-04-20

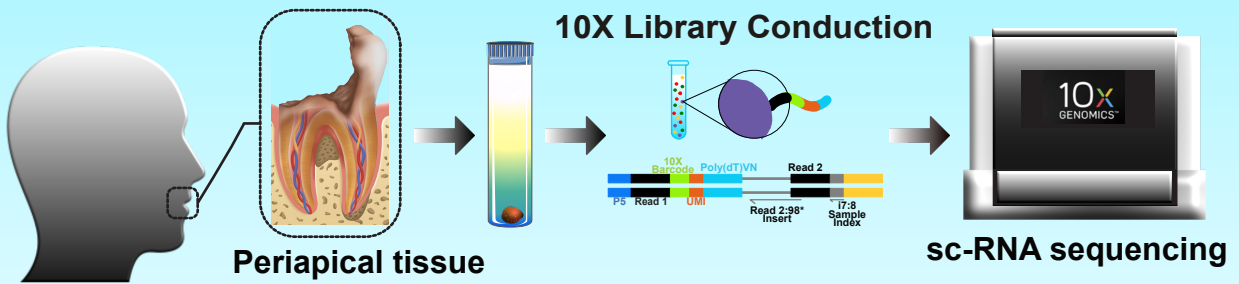

## Clustering Analysis

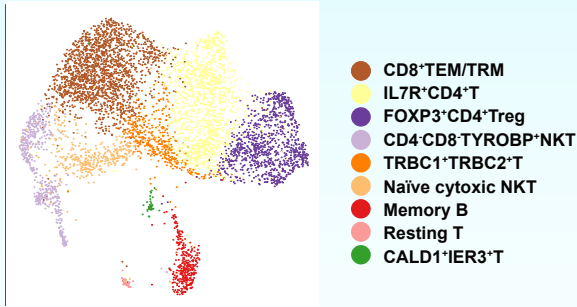

## Pseudotime Trajectory Inference

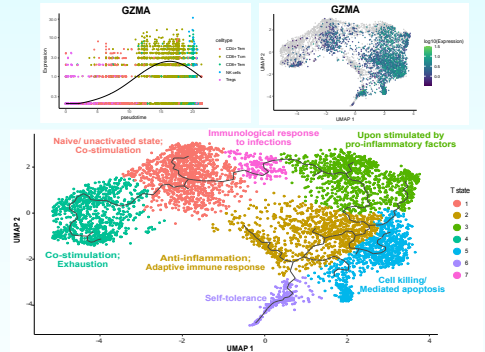

## Comparative Analysis

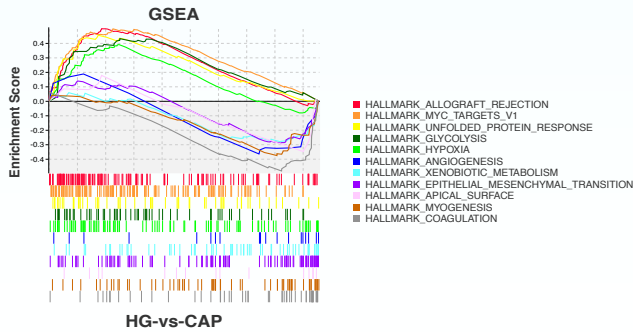

## Functional Enrichment & Pathway Analyses

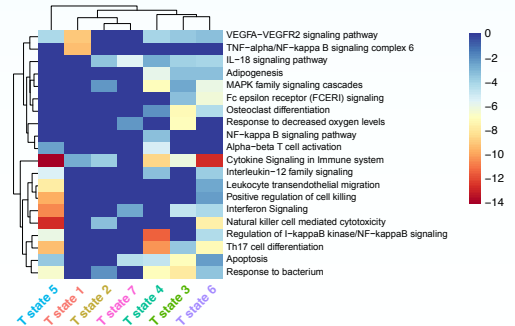

## GZMA promote angiogenesis in peripical lesions

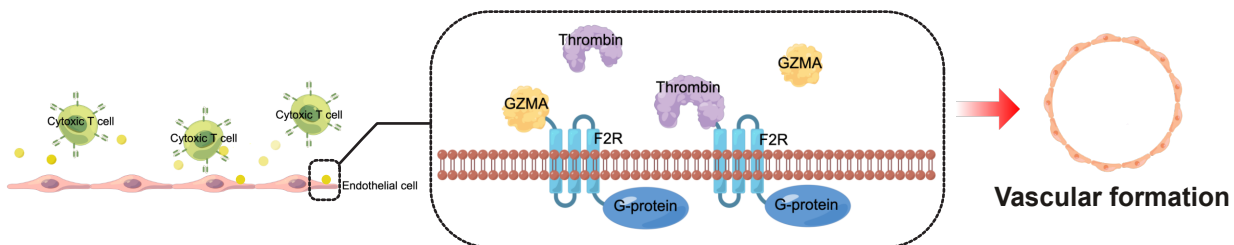

Supplement: Supplementary file 2 [file ffd13536b1fc75051b583fbc.pdf]
