# Supplementary figures and images for: Heterogeneity and functional diversity of human T cells in periapical lesions
Source: Research Square preprint supplement (doi:10.21203/rs.3.rs-1469457/v1), 2022-04-20

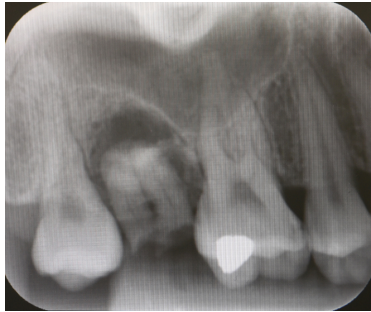

Sample A

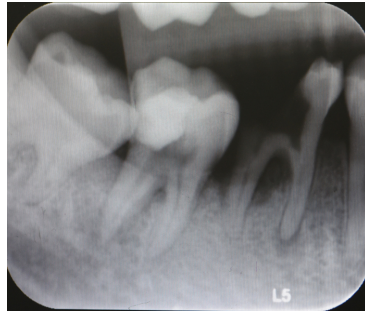

Sample B

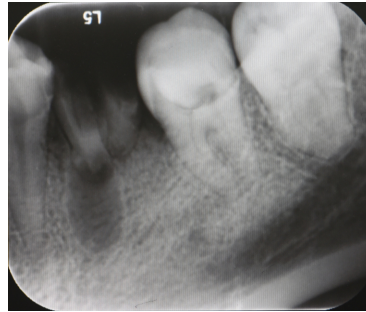

Sample C

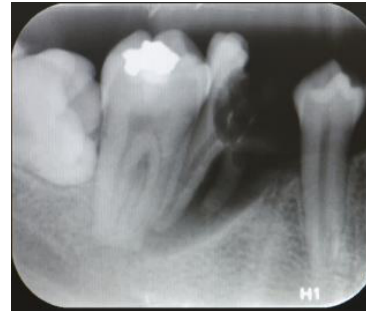

Sample D

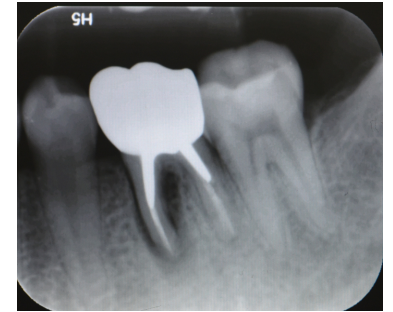

Sample E

Supplement: Supplementary file 1 [file dc0ff1098c996259d41f6138.pdf]
